# Supplementary material
Source: PubMed Central journal article supplement (PMC1695491)

Figure S1  
Swaim LE, et al.  
*Mycobacterium marinum* Infection of Adult Zebrafish Produces Caseating Granulomatous Tuberculosis that is Moderated by Adaptive Immunity

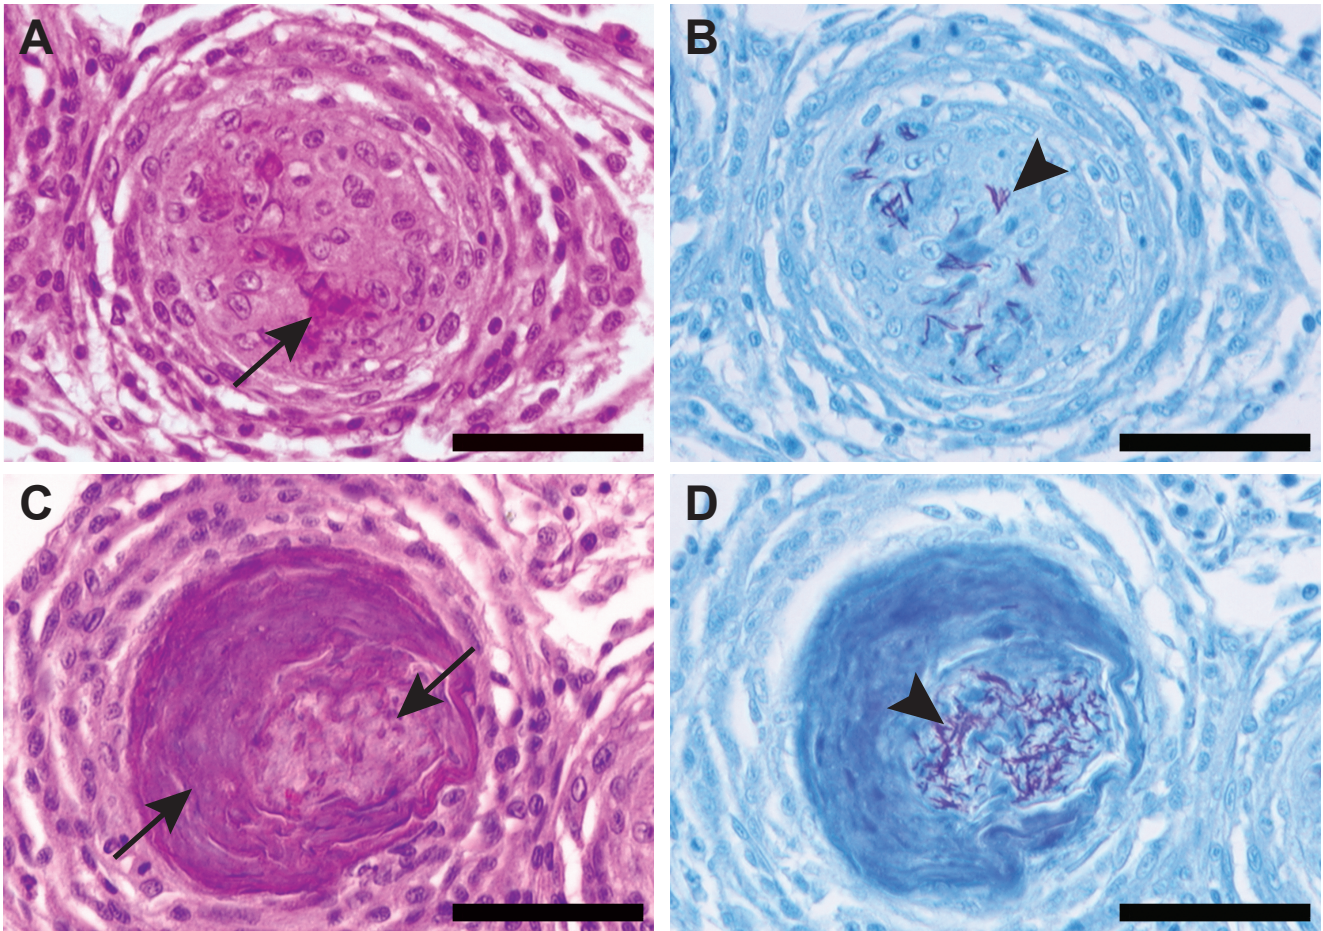

Supplement: iai_74_11_6108__1.pdf [file iai_74_11_6108__1.pdf]
